# Supplementary material
Source: MDPI journal article supplement (https://www.mdpi.com/2674-063X/3/1/3)
Supplement: s1 [file s1]

## Supplementary Material

Optical properties of AgAu clusters: effect of chemical configuration along a rearrangement pathway

Hans-Christian Weissker & Florent Calvo

# Spectra along rearrangement trajectory, $\text{Ag}_{27}\text{Au}_{28}$

Config\_001 =  $\text{Au}_{\text{core}}$ , Config\_001 = "intermediate", Config\_117 =  $\text{Ag}_{\text{core}}$

(cf. Figure 2 of main article)

# Total DOS along rearrangement trajectory, $\text{Ag}_{27}\text{Au}_{28}$

Config\_001 =  $\text{Au}_{\text{core}}$ , Config\_001 = "intermediate", Config\_117 =  $\text{Ag}_{\text{core}}$

(cf. Figure 3 of main article)

# Spectra of pure and core-shell AgAu 55-atom clusters

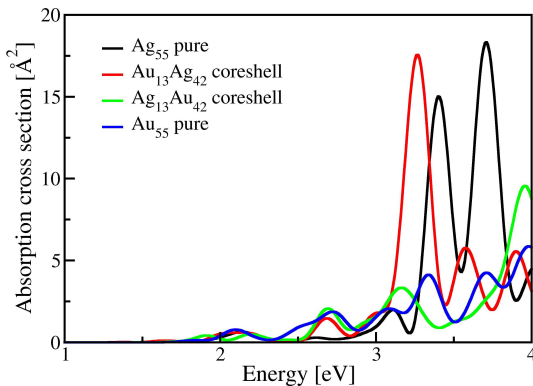

**Figure:** Calculated spectra of the pure 55-atom Ag and Au clusters and the two possible perfect core-shell structures with Ag and Au outer atoms, corresponding to the two compositions 13/42 and 42/13. The spectra are equivalent to those in Lopez-Lozano *et al.*, J. Phys. Chem. C, **117**, 3062–3068 (2013).

# PDOS of pure and core-shell AgAu 55-atom clusters

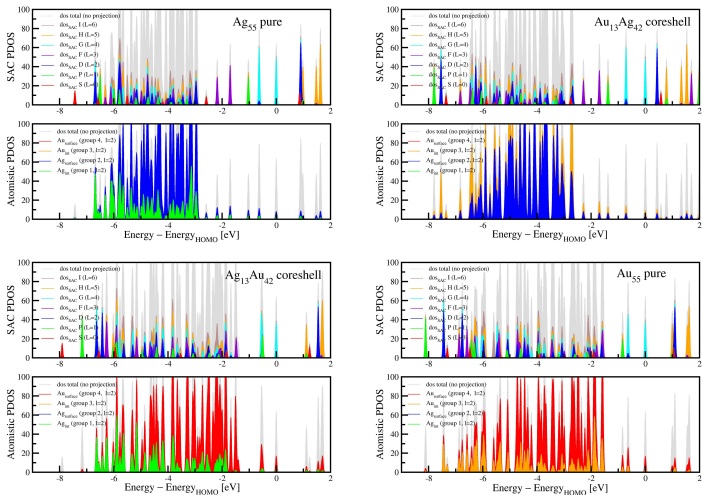

**Figure:** Projected densities of states of the pure 55-atom Ag and Au clusters and the two possible perfect core-shell structures with Ag and Au outer atoms, corresponding to the two compositions 13/42 and 42/13. In each case, the SAC projection (upper panels) along with the d contributions of the atomistic PDOS (lower panels) are shown. The latter are resolved into groups corresponding to the interior and surface atoms of each element.
